# Supplementary material
Source: publisher site journal article supplement (https://www.dovepress.com/article/603856)
Supplement: Supplementary file 1 [file 603856%20Revised%20supplement_3.docx]

**Table S1.** Asthma criteria of retrospective cohort: Spirometric criteria for diagnosis of asthma from GINA document

| Confirmed variable expiratory airflow limitation | |
| --- | --- |
| Documented excessive variability in lung function* (one or more of the tests below)  AND documented expiratory airflow limitation | The greater the variations, or the more occasions excess variation is seen, the more confident the diagnosis  At a time when FEV1 is reduced, confirm that FEV1/FVC is reduced (it is usually >0.75 in adults) |
| Positive bronchodilator reversibility test* (more likely to be positive if bronchodilator medication is withheld before test: SABA ≥4 hours, LABA ≥15 hours | Increase in FEV1 of >12% and >200 mL from baseline, 10-15 minutes after 200-400 mcg albuterol or equivalent (greater confidence if increase is >15% and >400 mL) |
| Excessive variability in twice-daily PEF over 2 weeks* | Average daily diurnal PEF variability > 10%† |
| Significant increase in lung function after 4 weeks of anti-inflammatory treatment | Increase in FEV1 by >12% and >200 mL (or PEF‡ by >20%) from baseline after 4 weeks of treatment, outside respiratory infections |
| Positive exercise challenge test* | Fall in FEV1 of >10% and >200 mL from baseline |
| Positive bronchial challenge test (usually only performed in adults) | Fall in FEV1 from baseline of ≥20% with standard doses of methacholine or histamine, or ≥15% with standardized hyperventilation, hypertonic saline or mannitol challenge |
| Excessive variation in lung function between visits* (less reliable) | Variation in FEV1 of >12% and >200mL between visits, outside of respiratory infections |

*These tests can be repeated during symptoms or in the early morning.

†Daily diurnal PEF variability is calculated from twice daily PEF as ([day’s highest minus day’s lowest]/mean of day’s highest and lowest), and averaged over one week

‡For PEF, use the same meter each time, as PEF may vary by up to 20% between different meters.

FEV1 = forced expiratory volume in 1 second; FVC = forced vital capacity; LABA = long-acting β2 agonist; PEF = peak expiratory flow; SABA = short-acting β2 agonist

**Box S1**. Inclusion and exclusion criteria of the International Severe Asthma Registry (ISAR) cohort for study enrollment

| Inclusion criteria |
| --- |
| Severe refractory asthma defined as meeting one or more of the following criteria:  1. According to the GINA 2020 definition of ‘difficult to treat asthma’: Patients whose asthma remains poorly controlled despite treatment with Step 4 or 5 medications  2. At the time of the study, patients who, despite reaching well control on Step 4 or 5 medications, meet one or more of the following criteria:  1) Having one or more urgent care visits per year (emergency room visits, hospitalizations, or emergency outpatient visits due to asthma exacerbation)  2) Requiring systemic steroids three or more times per year (prednisolone 15mg/day for more than 3 days).  3) Experiencing immediate asthma exacerbation when reducing the dose of oral or inhaled corticosteroid medication by less than 25%  3) Having had a near-fatal asthma attack at least once in the past |
| Exclusion criteria |
| 1. Bronchiectasis (including mild cases)  2. Tuberculosis-destroyed lung  3. Interstitial lung disease  4. Other chronic respiratory diseases excluding asthma (e.g., tuberculosis, active infectious diseases)  5. Severe mental disorders that could interfere with the study (e.g., schizophrenia)  6. Severe congestive heart failure  7. Other severe systemic diseases (e.g., chronic renal failure requiring dialysis, severe liver disease)  8. Continuous need for oral steroids due to other diseases  9. Life expectancy less than 3 years due to malignant tumors, etc. (Patients with no evidence of disease for 5 years are eligible) |

**Table S2.** Longitudinal stability of the FEV1/FVC ratio across serial pulmonary function tests according to baseline PAL status

|  | Asthma with PAL  (n = 640) | Asthma without PAL  (n = 209) |
| --- | --- | --- |
| Baseline FEV1/FVC, % | 52.88 ± 10.66 | 77.33 ± 6.15 |
| 2nd PFT |  |  |
| Time from baseline, year | 1.02 ± 0.72 | 1.22 ± 0.89 |
| No. of patients | 459 | 114 |
| FEV1/FVC, % | 52.58 ± 10.90 | 74.57 ± 7.79 |
| 3rd PFT |  |  |
| Time from baseline, year | 2.03 ± 0.93 | 2.20 ± 1.12 |
| No. of patients | 394 | 80 |
| FEV1/FVC, % | 52.01 ± 11.44 | 74.27 ± 9.01 |
| 4th PFT |  |  |
| Time from baseline, year | 3.07 ± 1.12 | 3.01 ± 1.16 |
| No. of patients | 325 | 59 |
| FEV1/FVC, % | 51.89 ± 11.37 | 74.21 ± 7.58 |
| 5th PFT |  |  |
| Time from baseline, year | 4.21 ± 1.27 | 4.25 ± 1.35 |
| No. of patients | 257 | 41 |
| FEV1/FVC, % | 51.44 ± 12.07 | 75.63 ± 6.69 |

Data are presented as mean ± standard deviation.

FEV1 = forced expiratory volume in 1 second; FVC = forced vital capacity; PAL = persistent airflow limitation; PFT = pulmonary function test.

**
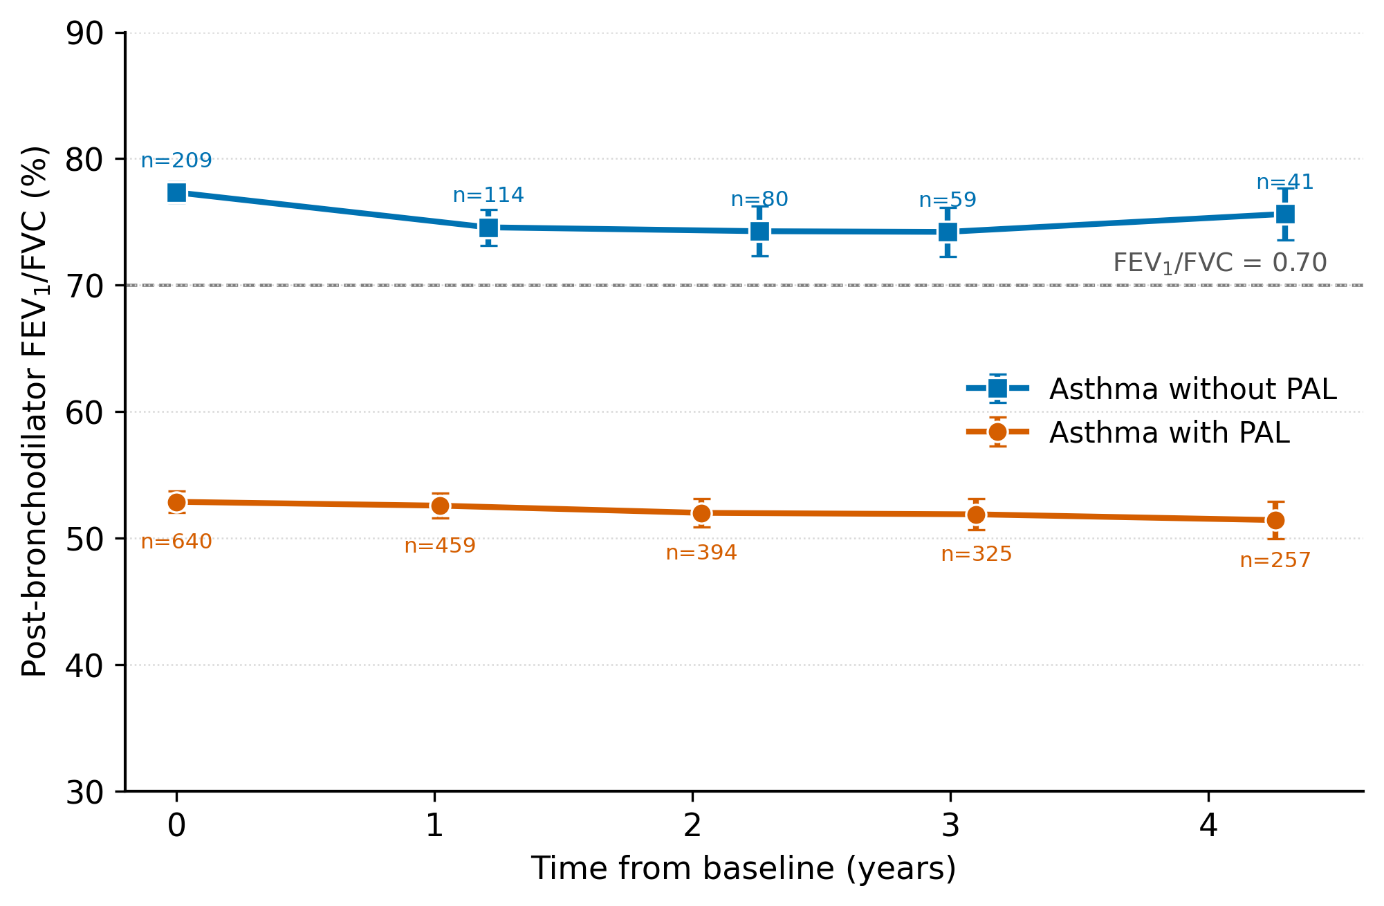
**

**Figure S1.** Longitudinal stability of the post-bronchodilator FEV1/FVC ratio across serial pulmonary function tests, according to baseline PAL status. Data points represent group means, and error bars denote 95% confidence intervals. The dashed line indicates the diagnostic threshold (FEV1/FVC = 0.70). The mean FEV1/FVC ratio remained below 0.70 at every assessment in the PAL group and above 0.70 throughout in the non-PAL group, with no crossing of the diagnostic threshold, indicating that the baseline classification reflected persistent rather than transient airflow limitation. The number of patients contributing to each time point is shown.


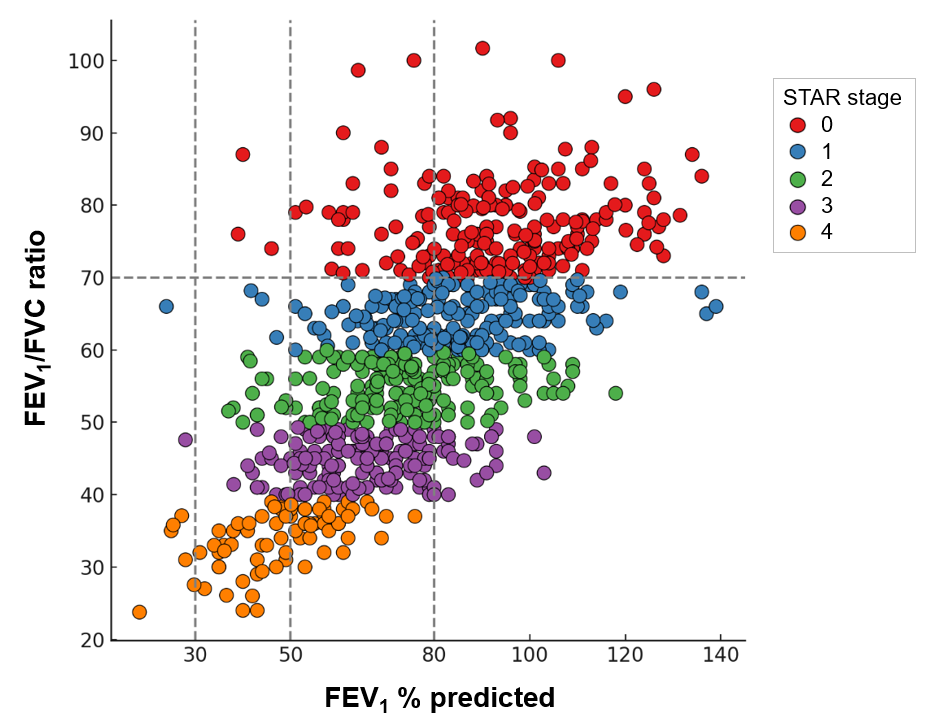


**Figure S2.** Distribution of disease severity by according to the presence of persistent airflow limitation and STaging of Airflow obstruction using Ratio severity classification (STAR stage) in asthma patients. STAR stage 0 indicates absence of PAL, while stages 1–4 correspond to the presence of PAL with progressively more severe airflow limitation. FEV1 = forced expiratory volume in 1 second; FVC = forced vital capacity.

**Table S3. Asthma medication uses according to PAL status**

|  | Asthma with PAL  (n = 532) | Asthma without PAL  (n = 135) | P-value |
| --- | --- | --- | --- |
| Inhaled corticosteroid (ICS), any | 362 (68.0) | 108 (80.0) | 0.009 |
| ICS–LABA combination | 329 (61.8) | 91 (67.4) | 0.273 |
| ICS monotherapy | 99 (18.6) | 41 (30.4) | 0.004 |
| ICS dose* |  |  | 0.127 |
| Low | 288 (79.6) | 90 (83.3) |  |
| Medium | 54 (14.9) | 17 (15.7) |  |
| High | 20 (5.5) | 1 (0.9) |  |
| ICS medication possession ratio† | 0.49 ± 0.44 | 0.58 ± 0.41 | 0.016 |
| LAMA | 220 (41.4) | 13 (9.6) | <0.001 |
| LAMA–LABA combination | 133 (25.0) | 8 (5.9) | <0.001 |
| LTRA | 94 (17.7) | 46 (34.1) | <0.001 |

Data are presented as n (%) or mean ± standard deviation. Medication data were available for the retrospective cohort (n = 667; 532 with PAL and 135 without PAL).

*ICS dose was categorized as low, medium, or high according to the GINA classification.

†The medication possession ratio was calculated as the proportion of days covered by dispensed ICS during the observation period.

ICS = inhaled corticosteroid; LABA = long-acting β2-agonist; LAMA = long-acting muscarinic antagonist; Leukotriene receptor antagonist; PAL = persistent airflow limitation

**Table S4.** Baseline and clinical characteristics of the study population according to STAR stage

|  | STAR 0  (n = 209) | STAR 1  (n = 205) | STAR 2  (n = 194) | STAR 3  (n = 163) | STAR 4  (n = 78) | P-value |
| --- | --- | --- | --- | --- | --- | --- |
| Follow-up period, years | 3.42 ± 1.68 | 3.67 ± 1.60 | 3.84 ± 1.80 | 3.94 ± 1.78 | 3.61 ± 1.73 | 0.028 |
| Age, years | 59.17 ± 14.03 | 64.67 ± 11.60 | 64.91 ± 11.15 | 68.55 ± 9.31 | 66.74 ± 11.02 | <0.001 |
| Male sex, n (%) | 91 (43.5) | 138 (67.3) | 147 (75.8) | 142 (87.1) | 72 (92.3) | <0.001 |
| Body mass index, kg/m2 | 24.77 ± 4.31 | 24.93 ± 3.48 | 24.11 ± 3.39 | 23.13 ± 3.34 | 21.37 ± 3.03 | <0.001 |
| Smoking status, n (%) |  |  |  |  |  | <0.001 |
| Never-smoker | 126 (60.9) | 81 (39.9) | 51 (26.6) | 27 (16.6) | 10 (13.0) |  |
| Ex-smoker | 60 (29.0) | 95 (46.8) | 100 (52.1) | 108 (66.3) | 54 (70.1) |  |
| Current smoker | 21 (10.1) | 27 (13.3) | 41 (21.4) | 28 (17.2) | 13 (16.9) |  |
| Smoking intensity, pack-years | 11.92 ± 21.70 | 21.24 ± 26.21 | 28.97 ± 25.56 | 37.40 ± 29.37 | 40.30 ± 29.58 | <0.001 |
| Charlson comorbidity index | 1.05 ± 1.02 | 1.09 ± 1.02 | 1.27 ± 1.19 | 1.27 ± 0.94 | 1.21 ± 0.97 | 0.035 |
| History of tuberculosis, n (%) | 15 (11.1) | 28 (17.9) | 28 (17.1) | 27 (18.5) | 18 (27.3) | 0.079 |
| Allergic rhinitis, n (%) | 48 (23.0) | 45 (22.0) | 29 (14.9) | 15 (9.2) | 8 (10.3) | 0.001 |
| Eczema, n (%) | 2 (1.0) | 2 (1.0) | 1 (0.5) | 0 (0) | 0 (0) | 0.653 |
| Baseline lung function* |  |  |  |  |  |  |
| FEV1, L | 2.21 ± 0.72 | 2.04 ± 0.58 | 1.82 ± 0.47 | 1.62 ± 0.37 | 1.20 ± 0.28 | <0.001 |
| FEV1, % predicted | 93.12 ± 18.13 | 83.88 ± 16.50 | 73.59 ± 15.29 | 65.96 ± 13.31 | 48.06 ± 11.73 | <0.001 |
| FVC, L | 2.87 ± 0.93 | 3.19 ± 0.94 | 3.32 ± 0.85 | 3.61 ± 0.81 | 3.54 ± 0.76 | <0.001 |
| FVC, % predicted | 91.06 ± 18.98 | 93.36 ± 17.44 | 95.07 ± 18.14 | 101.76 ± 18.27 | 97.92 ± 17.93 | <0.001 |
| FEV1/FVC ratio | 77.33 ± 6.15 | 64.55 ± 2.95 | 54.88 ± 2.94 | 44.78 ± 2.83 | 34.18 ± 3.90 | <0.001 |
| DLCO, mL/mmHg/min | 15.30 ± 5.21 | 15.56 ± 5.40 | 15.17 ± 5.84 | 14.04 ± 3.95 | 11.51 ± 4.39 | <0.001 |
| DLCO, % | 84.12 ± 19.66 | 86.27 ± 22.32 | 85.37 ± 23.12 | 83.28 ± 19.23 | 73.92 ± 24.62 | 0.016 |
| FeNO, ppb | 46.09 ± 46.37 | 37.38 ± 31.49 | 35.65 ± 24.83 | 32.81 ± 24.26 | 26.69 ± 18.35 | 0.757 |
| Blood eosinophil count, cells/μL | 303.84 ± 408.15 | 323.01 ± 354.49 | 247.71 ± 243.85 | 225.86 ± 238.32 | 268.14 ± 366.55 | 0.381 |
| Blood eosinophil count, % | 3.40 ± 3.84 | 3.73 ± 4.22 | 3.30 ± 3.11 | 2.97 ± 3.17 | 3.83 ± 5.02 | 0.937 |
| Blood neutrophil/lymphocyte ratio | 3.54 ± 8.32 | 3.25 ± 4.29 | 3.65 ± 8.11 | 3.63 ± 5.50 | 4.08 ± 3.85 | 0.317 |
| Chest CT findings, n (%) |  |  |  |  |  |  |
| Bronchiectasis | 43 (31.9) | 53 (34.0) | 62 (37.8) | 68 (46.6) | 25 (37.9) | 0.100 |
| Tuberculosis-destroyed lung | 1 (0.7) | 5 (3.2) | 7 (4.3) | 11 (7.5) | 5 (7.6) | 0.042 |

Data are presented as n (%) or mean ± standard deviation.

*Post-bronchodilator

CT = computed tomography; DLCO = diffusing capacity of the lungs for carbon monoxide; FeNO = fractional exhaled nitrogen oxide; FEV1 = forced expiratory volume in 1 second; FVC = forced vital capacity; STAR = STaging of Airflow obstruction using Ratio severity classification

**Table S5.** Prediction of PAL according to the clinical characteristics based on ROC curve analysis

|  | Cut off | Sensitivity | Specificity | OR (95% CI) | P-value | aOR (95% CI)* | P-value |
| --- | --- | --- | --- | --- | --- | --- | --- |
| Age, year | ≥ 63.5 | 0.64 | 0.62 | 2.97 (2.15–4.11) | <0.001 | 3.91 (2.63–5.81) | <0.001 |
| Smoking intensity, pack-year | ≥ 9.5 | 0.68 | 0.67 | 3.96 (2.84–5.52) | <0.001 | 3.16 (2.16–4.62) | <0.001 |
| FEV1 % predicted, % | ≤ 83.7 | 0.76 | 0.74 | 8.97 (6.29–12.79) | <0.001 | 10.59 (7.10–15.79) | <0.001 |

*The model was adjusted by including age, smoking intensity, and FEV1 % predicted values that exceeded the respective cut-off thresholds.

aOR = adjusted odds ratio; CI = confidence interval; FEV1 = forced expiratory volume in 1 second; OR = odds ratio

**Table S6.** Classification and history of exacerbation according to STAR stage

|  | STAR 0  (n = 209) | STAR 1  (n = 205) | STAR 2  (n = 194) | STAR 3  (n = 163) | STAR 4  (n = 78) | P-value |
| --- | --- | --- | --- | --- | --- | --- |
| Exacerbation during follow-up, n (%) |  |  |  |  |  |  |
| Moderate | 62 (29.7) | 62 (30.2) | 57 (29.4) | 48 (29.4) | 29 (37.2) | 0.138 |
| Severe | 12 (5.7) | 25 (12.2) | 21 (10.8) | 19 (11.7) | 18 (23.1) | 0.010 |
| Moderate-to-severe | 64 (30.6) | 67 (32.7) | 60 (30.9) | 58 (35.6) | 34 (43.6) | 0.175 |
| Annual incidence rate of acute exacerbation |  |  |  |  |  |  |
| Moderate | 0.30 ± 0.53 | 0.20 ± 0.33 | 0.25 ± 0.49 | 0.20 ± 0.48 | 0.40 ± 0.63 | 0.066 |
| Severe | 0.05 ± 0.21 | 0.08 ± 0.23 | 0.09 ± 0.32 | 0.09 ± 0.36 | 0.16 ± 0.35 | 0.018 |
| Moderate-to-severe | 0.35 ± 0.60 | 0.28 ± 0.46 | 0.35 ± 0.67 | 0.29 ± 0.62 | 0.56 ± 0.86 | 0.100 |
| Frequent exacerbator, n (%) | 5 (2.4) | 3 (1.5) | 5 (2.6) | 6 (3.7) | 5 (6.4) | 0.340 |

STAR = STaging of Airflow obstruction using Ratio severity classification

**Table S7.** Risk of severe exacerbations according to PAL status and severity (STAR stage)

|  | Adjusted HR (95% CI)* | P-value |
| --- | --- | --- |
| PAL present (vs. absent) | 0.87 (0.66−1.16) | 0.055 |
| STAR 0 | 1 (ref) |  |
| STAR 1 | 1.93 (0.97−3.84) | 0.061 |
| STAR 2 | 1.38 (0.68−2.81) | 0.374 |
| STAR 3 | 1.53 (0.74−3.16) | 0.251 |
| STAR 4 | 3.32 (1.60−6.89) | 0.001 |

*Hazard ratios were estimated using multivariable Cox proportional hazards models adjusted for age, sex, body mass index, smoking intensity, and baseline FEV1 % predicted.

CI = confidence interval; HR = hazard ratio; PAL = persistent airflow limitation; STAR = STaging of Airflow obstruction using Ratio severity classification

**Table S8.** Annual decline in lung function according to PAL status

|  | Univariable | | Multivariable* | |
| --- | --- | --- | --- | --- |
| Variables | β ± SE | *P*-value | β ± SE | *P*-value |
| FEV1, mL/year |  | 0.065 |  | 0.028 |
| Without PAL | −37.2 ± 7.3 |  | −42.5 ± 6.4 |  |
| With PAL | −25.2 ± 3.1 |  | −28.1 ± 2.9 |  |
| FEV1, %/year |  | 0.067 |  | 0.035 |
| Without PAL | −0.60 ± 0.34 |  | −0.68 ± 0.33 |  |
| With PAL | −0.02 ± 0.14 |  | −0.04 ± 0.14 |  |
| FVC, mL/year |  | 0.500 |  | 0.392 |
| Without PAL | −32.2 ± 9.0 |  | −32.9 ± 8.0 |  |
| With PAL | −40.7 ± 5.5 |  | −44.0 ± 5.1 |  |
| FVC, %/year |  | 0.398 |  | 0.296 |
| Without PAL | −0.56 ± 0.27 |  | −0.67 ± 0.27 |  |
| With PAL | −0.33 ± 0.13 |  | −0.40 ± 0.13 |  |
| FEV1/FVC, %/year |  | 0.065 |  | 0.057 |
| Without PAL | −0.61 ± 0.17 |  | −0.60 ± 0.17 |  |
| With PAL | −0.19 ± 0.07 |  | −0.19 ± 0.07 |  |
| DLCO, %/year |  | 0.793 |  | 0.929 |
| Without PAL | −0.99 ± 0.50 |  | −1.22 ± 0.56 |  |
| With PAL | −1.16 ± 0.23 |  | −1.19 ± 0.24 |  |

*Adjusted for age, sex, and baseline lung function (FEV1, FVC, or DLCO).

DLCO = diffusing capacity of the lungs for carbon monoxide; FEV1 = forced expiratory volume in 1 second; FVC = forced vital capacity; PAL = persistent airflow limitation; SE = standard error

**Table S9.** Longitudinal changes in lung function according to STAR stage

| Variables | Univariable | | Multivariable* | |
| --- | --- | --- | --- | --- |
| β ± SE | P-value | β ± SE | P-value |
| FEV1, mL/year |  | 0.103 |  | 0.019 |
| STAR 0 | −37.2 ± 7.3 |  | −42.5 ± 6.4 |  |
| STAR 1 | −33.6 ± 6.5 |  | −37.8 ± 5.7 |  |
| STAR 2 | −20.6 ± 5.3 |  | −22.4 ± 5.0 |  |
| STAR 3 | −17.3 ± 5.5 |  | −20.9 ± 5.0 |  |
| STAR 4 | −28.9 ± 9.3 |  | −36.1 ± 8.9 |  |
| FEV1, %/year |  | 0.086 |  | 0.040 |
| STAR 0 | −0.60 ± 0.34 |  | −0.68 ± 0.33 |  |
| STAR 1 | −0.15 ± 0.28 |  | −0.23 ± 0.28 |  |
| STAR 2 | 0.18 ± 0.24 |  | 0.10 ± 0.24 |  |
| STAR 3 | 0.27 ± 0.23 |  | 0.24 ± 0.23 |  |
| STAR 4 | −0.41 ± 0.40 |  | −0.59 ± 0.39 |  |
| FVC, mL/year |  | 0.019 |  | 0.002 |
| STAR 0 | −32.2 ± 9.0 |  | −32.9 ± 8.0 |  |
| STAR 1 | −46.4 ± 15.4 |  | −56.0 ± 12.4 |  |
| STAR 2 | −23.5 ± 7.5 |  | −23.0 ± 6.9 |  |
| STAR 3 | −40.6 ± 7.9 |  | −42.5 ± 7.5 |  |
| STAR 4 | −77.7 ± 14.4 |  | −80.0 ± 12.7 |  |
| FVC, %/year |  | 0.025 |  | 0.021 |
| STAR 0 | −0.56 ± 0.27 |  | −0.67 ± 0.27 |  |
| STAR 1 | −0.48 ± 0.27 |  | −0.53 ± 0.26 |  |
| STAR 2 | 0.03 ± 0.22 |  | −0.03 ± 0.22 |  |
| STAR 3 | −0.26 ± 0.23 |  | −0.27 ± 0.23 |  |
| STAR 4 | −1.29 ± 0.43 |  | −1.31 ± 0.41 |  |
| FEV1/FVC, %/year |  | 0.024 |  | 0.028 |
| STAR 0 | −0.61 ± 0.17 |  | −0.60 ± 0.17 |  |
| STAR 1 | −0.19 ± 0.11 |  | −0.16 ± 0.11 |  |
| STAR 2 | −0.33 ± 0.13 |  | −0.32 ± 0.13 |  |
| STAR 3 | −0.01 ± 0.12 |  | −0.03 ± 0.12 |  |
| STAR 4 | −0.15 ± 0.20 |  | −0.19 ± 0.20 |  |
| DLCO, %/year |  | 0.944 |  | 0.995 |
| STAR 0 | −0.99 ± 0.50 |  | −1.22 ± 0.56 |  |
| STAR 1 | −1.17 ± 0.54 |  | −1.26 ± 0.58 |  |
| STAR 2 | −1.00 ± 0.40 |  | −1.15 ± 0.43 |  |
| STAR 3 | −1.16 ± 0.40 |  | −1.03 ± 0.42 |  |
| STAR 4 | −1.57 ± 0.49 |  | −1.44 ± 0.53 |  |

*Adjusted for age, sex, and baseline lung function (FEV1 or FVC or DLCO)

DLCO = diffusing capacity of the lungs for carbon monoxide; FEV1 = forced expiratory volume in 1 second; FVC = forced vital capacity; SE = standard error; STAR = STaging of Airflow obstruction using Ratio severity classification
